# Supplementary material for: In silicoinvestigation of the selectivity mechanism of A1AR and A2AAR antagonism
Source: Royal Society of Chemistry journal article supplement (doi:10.1039/d2nj03536g), 2022-01-01
Supplement: d2nj03536g1.pdf [file d2nj03536g1.pdf]

## Selectivity mechanism of A<sub>1</sub>AR and A<sub>2A</sub>AR antagonism through *in silico* investigation

Weixia Li<sup>a,b,c</sup>, Baichun Hu<sup>a,b,d</sup>, Haihan Liu<sup>a,b,c</sup>, Jiasi Luan<sup>a,b,e</sup>, Lu Chen<sup>a,b,c</sup>, Shizun Wang<sup>a,b,c</sup>, Liye Fan<sup>a,b,c</sup>, Jian Wang<sup>a,b,c\*</sup>

*a* Key Laboratory of Structure-Based Drug Design & Discovery of Ministry of Education, Shenyang Pharmaceutical University, Shenyang 110016, People's Republic of China

*b* Key Laboratory of Intelligent Drug Design and New Drug Discovery of Liaoning Province, Shenyang Pharmaceutical University, Shenyang 110016, China

*c* School of Pharmaceutical Engineering, Shenyang Pharmaceutical University, Shenyang 110016, People's Republic of China

*d* School of Pharmacy, Shenyang Pharmaceutical University, Shenyang 110016, People's Republic of China

*e* School of Medical Devices, Shenyang Pharmaceutical University, Shenyang 110016, People's Republic of China

Corresponding author: Prof. Jian Wang, E-mail: jianwang@syphu.edu.cn.

## **Table of contents**

|                       |          |
|-----------------------|----------|
| <b>Figure S1.....</b> | <b>3</b> |
| <b>Table S1.....</b>  | <b>3</b> |
| <b>Figure S2.....</b> | <b>3</b> |
| <b>Figure S3.....</b> | <b>4</b> |
| <b>Figure S4.....</b> | <b>5</b> |
| <b>FigureS5.....</b>  | <b>6</b> |

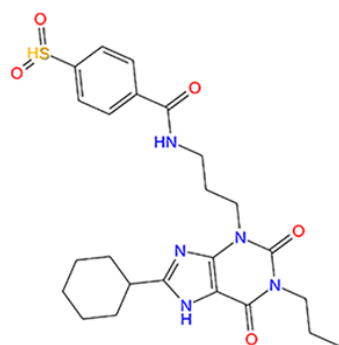

**DU1**

$A_1AR$   $K_d=0.27-0.37$  nM  
 $IC_{50}=24.9$  nM

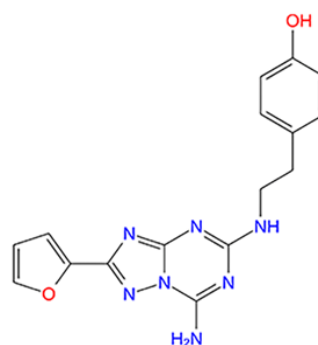

**ZMA**

$A_{2A}AR$   $K_i=0.1-64$  nM  
 $K_d=0.22$  nM  
 $IC_{50}=0.68-81$  nM

**Figure S1.** Chemical structures of  $A_1AR$  and  $A_{2A}AR$  co-crystalline small molecules with strong inhibitory activity. DU1 is a co-crystal ligand of  $A_1AR$  (PDB ID: 5UEN), ZMA is a co-crystal ligand of  $A_{2A}AR$  (PDB ID: 6PS7).

**Table S1.** Docking results of  $A_1/A_{2A}AR$  co-crystal ligands

| Co-crystal | Target     | $K_i$ (nM) | $K_d$ (nM) | $IC_{50}$ (nM) | XP<br>GScore<br>(kcal/mol) | Glide<br>emodel<br>(kcal/mol) |
|------------|------------|------------|------------|----------------|----------------------------|-------------------------------|
| DU1        | $A_1AR$    | -          | 0.27-0.37  | 24.9           | -11.831                    | -102.537                      |
| ZMA        | $A_{2A}AR$ | 0.1-64     | 0.22       | 0.68-81        | -11.268                    | -84.699                       |

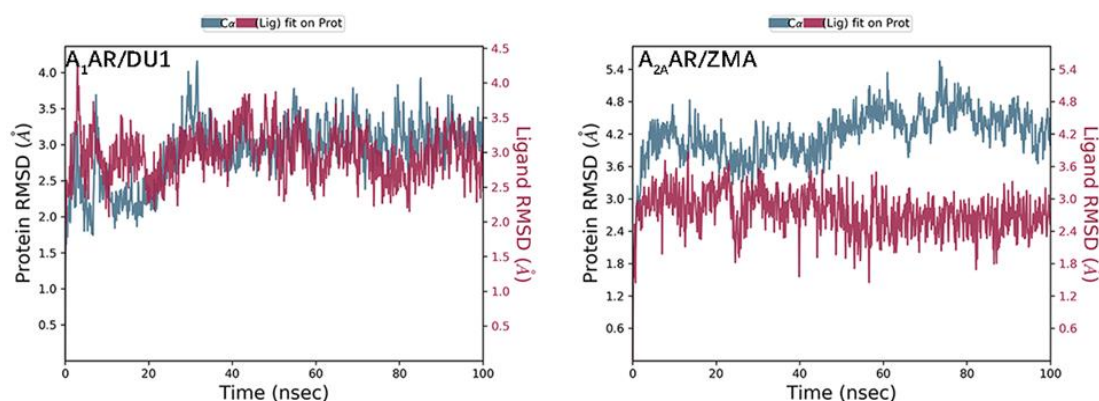

**Figure S2.** RMSD line charts of protein backbone and ligands during 100 ns MD simulation of co-crystal ligands and proteins.

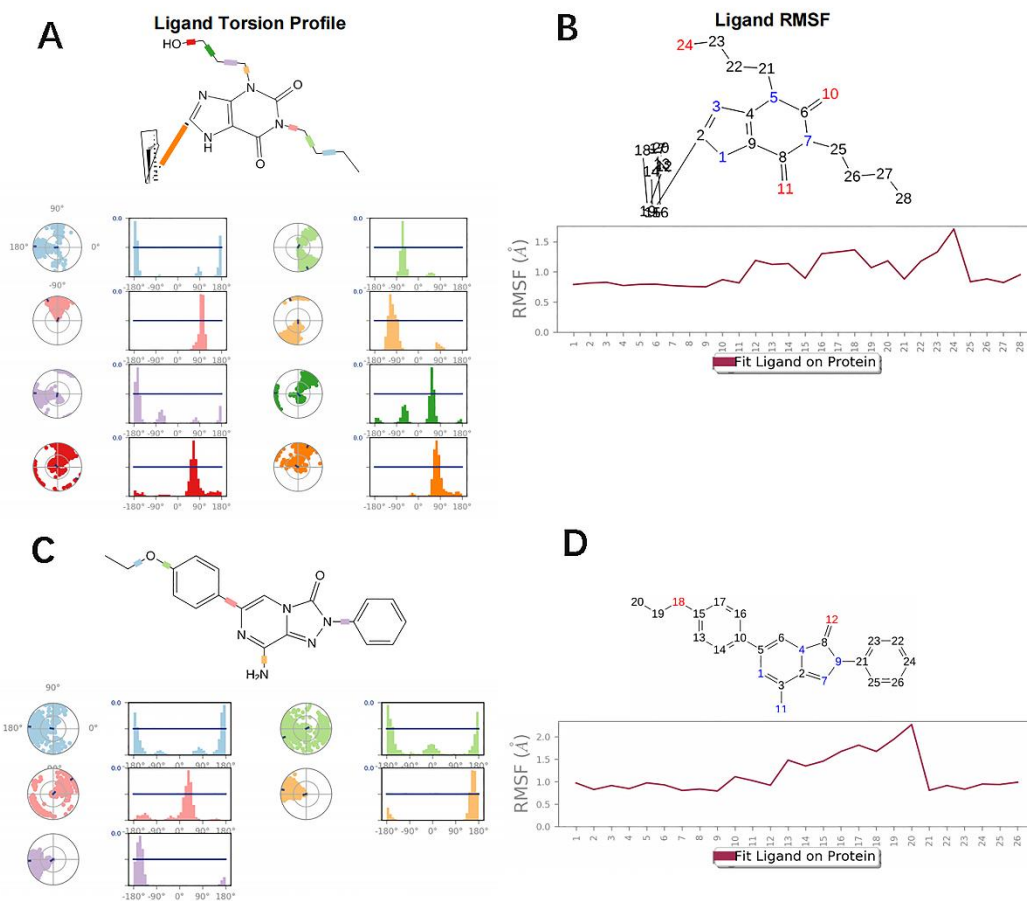

**Figure S3.** The ligand torsions plot and RMSF during the MD simulation. (A) The torsions plot of PSB-36. (B) The RMSF of PSB-36. (C) The torsions plot of CPD2. (D) The RMSF of CPD2.

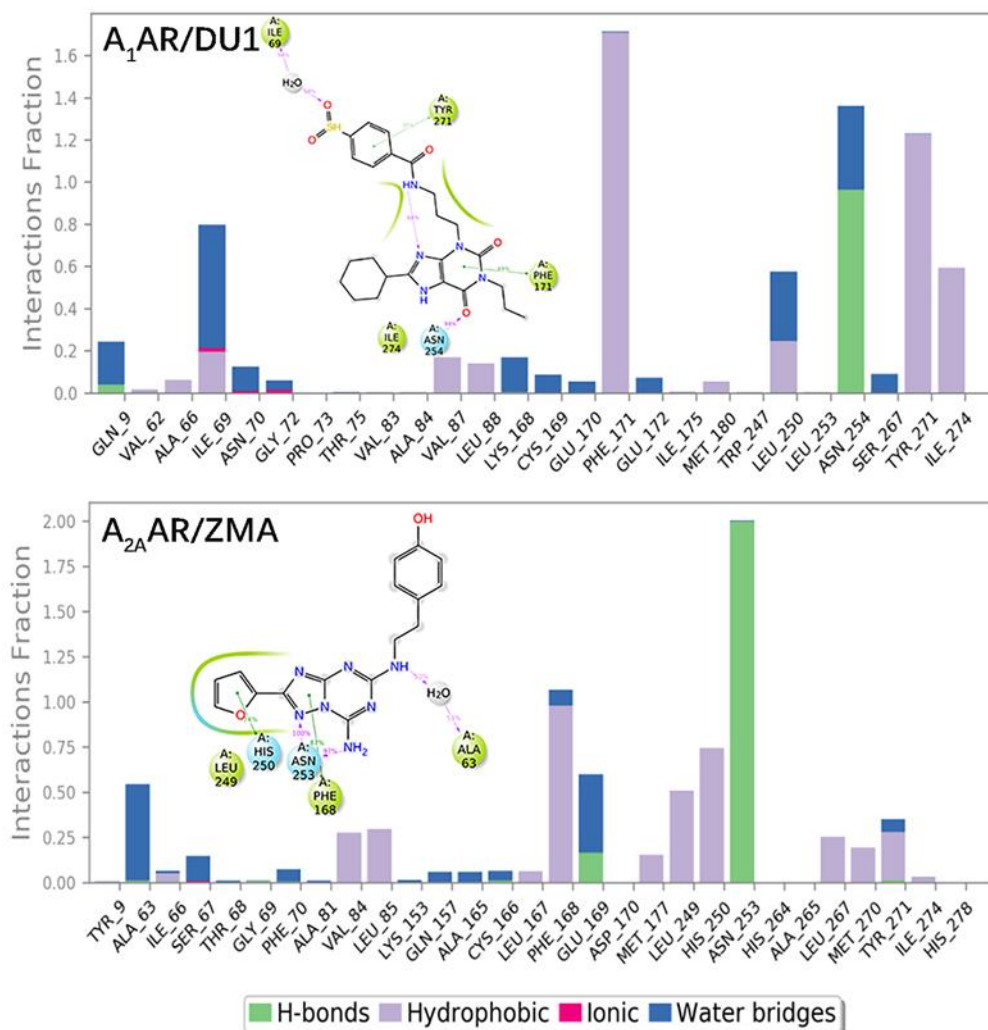

**Figure S4.** Molecular interactions of A<sub>1</sub>AR and A<sub>2A</sub>AR co-crystal ligands from MD simulations.

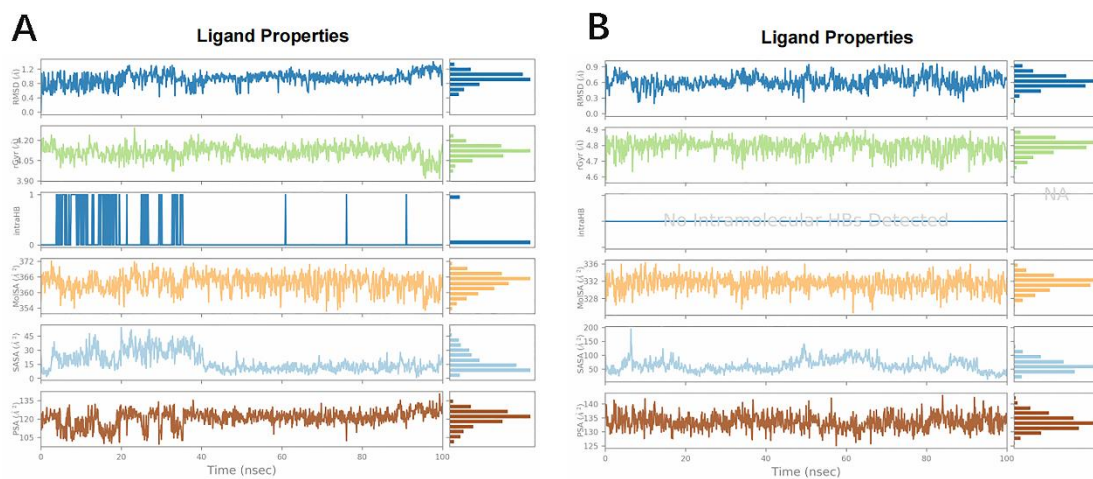

**Figure S5.** Various properties of small molecules during molecular simulations. (A)

The properties of PSB-36. (B) The properties of CPD2.
